# Supplementary material for: Clinical feasibility study of transcatheter edge-to-edge mitral valve repair in dogs with the canine V-Clamp device
Source: PubMed Central journal article supplement (PMC11663856; doi:10.3389/fvets.2024.1448828), 2024-12-09
Supplement: Data_Sheet_1.pdf [file Data_Sheet_1.pdf]

## *Supplementary Material*

| <b>Supplemental Table A: Dog Breeds Included</b>                                                                                                                                 |    |
|----------------------------------------------------------------------------------------------------------------------------------------------------------------------------------|----|
| CKCS                                                                                                                                                                             | 14 |
| Mixed Breed                                                                                                                                                                      | 14 |
| Chihuahua                                                                                                                                                                        | 3  |
| Dachshund                                                                                                                                                                        | 2  |
| Shih Tzu                                                                                                                                                                         | 2  |
| Havanese                                                                                                                                                                         | 2  |
| Maltese                                                                                                                                                                          | 2  |
| Beagle                                                                                                                                                                           | 2  |
| <u>Other Breeds:</u><br>Bichon, Cocker Spaniel, Jack Russell<br>Terrier, Japanese Chin, Miniature<br>Poodle, Pomeranian, Scottish Terrier,<br>Shetland Sheepdog, Tibetan Terrier | 9  |
