# Supplementary material for: Clinical feasibility study of transcatheter edge-to-edge mitral valve repair in dogs with the canine V-Clamp device
Source: PubMed Central journal article supplement (PMC11663856; doi:10.3389/fvets.2024.1448828), 2024-12-09
Supplement: Data_Sheet_2.pdf [file Data_Sheet_2.pdf]

## *Supplementary Material*

| <b>Supplemental Table B: Procedural Failures, Deaths Before Hospital Discharge and Adverse Device-Related Events</b> |                                                                                                                                         |                    |                                                       |
|----------------------------------------------------------------------------------------------------------------------|-----------------------------------------------------------------------------------------------------------------------------------------|--------------------|-------------------------------------------------------|
| <b>Case #</b>                                                                                                        | <b>Procedural Failures</b>                                                                                                              | <b>ACVIM Stage</b> | <b>Follow-up</b>                                      |
| 2                                                                                                                    | Unable to grasp leaflets                                                                                                                | C                  | Died congestive heart failure 44 days after discharge |
| 34                                                                                                                   | Unable to grasp leaflets                                                                                                                | C                  | Sudden death 48 hours after discharge                 |
|                                                                                                                      | <b>Deaths Before Hospital Discharge</b>                                                                                                 |                    |                                                       |
| 15                                                                                                                   | Severe MR due to papillary evulsion                                                                                                     | C                  | Euthanasia 3 days post-procedure                      |
| 22                                                                                                                   | Worsened MR due to leaflet injury during procedure                                                                                      | C                  | Euthanasia 1 day post-procedure                       |
|                                                                                                                      | <b>Adverse Device-Related Events</b>                                                                                                    |                    |                                                       |
| 5                                                                                                                    | Clamp opened after deployment but remained attached to leaflets. Second clamp successfully placed at time of index procedure.           | B2                 | Alive 1133 days*                                      |
| 14                                                                                                                   | Single leaflet detachment 2 days post-procedure. Second clamp successfully placed 2 days after index procedure.                         | B2                 | Euthanized 637 days post procedure due to GI lymphoma |
| 38                                                                                                                   | Clamp opened during procedure, detached, and embolized to ascending aorta. Second clamp successfully placed at time of index procedure. | B2                 | Alive 686 days*                                       |
| <i>*Days reported represent days alive until October 28<sup>th</sup>, 2024</i>                                       |                                                                                                                                         |                    |                                                       |
